# Supplementary material
Source: publisher figshare collection journal article supplement (https://rs.figshare.com/ndownloader/files/6906473)
Supplement: Supplementary file [file 6906473]

**Figure S2:** Raw MOTU richness compared to asymptotic non-parametric richness estimates, Chao2 and ICE.

**Figure S3:** Two-dimensional NMDS plots constructed based on Morisita-Horn dissimilarities community structure between and within Pandan and Bedok Reservoirs based on the sequencing read counts representing each MOTU. Crosses represent the centroids of MOTU communities at each sampling point, while lines connect surface and benthic sampling depths at the same site. Ellipses represent the sample set at each depth at each reservoir and triangles represent their centroids, where PNS: Pandan surface; PNB: Pandan benthic; BKS: Bedok surface; BKB: Bedok benthic. Comparisons were made using **(a)** all MOTUs, and **(b)** only common MOTUs.

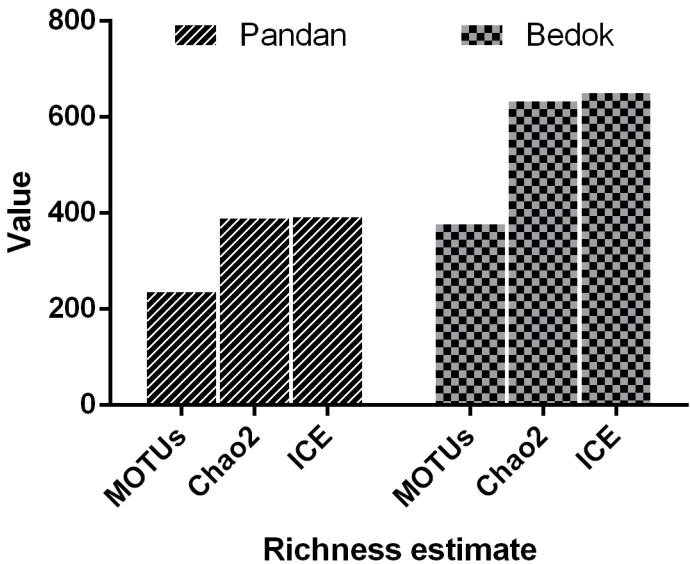

a All MOTUs  
sequencing read counts

NMDS2

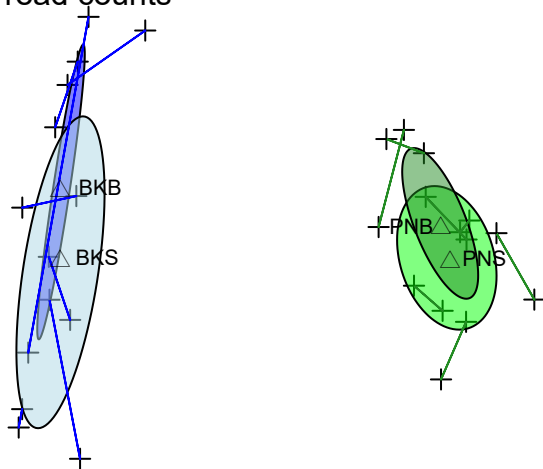

stress = 0.112

NMDS1

b Common MOTUs  
sequencing read counts

NMDS2

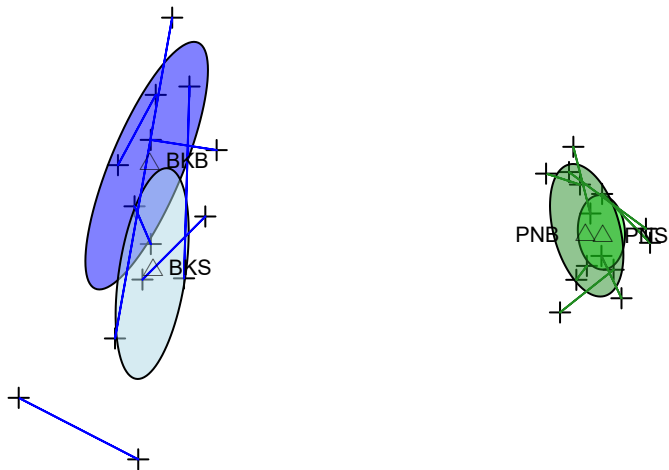

NMDS1
